# Supplementary material for: Intermolecular proton-coupled electron transfer reconstructs aggregates for near-infrared-light-driven hydrogen evolution
Source: Royal Society of Chemistry journal article supplement (doi:10.1039/d4tc04703f), 2024-12-21
Supplement: d4tc04703f1.pdf [file d4tc04703f1.pdf]

## Supporting Information

### **Intermolecular proton-coupled electron transfer reconstructs aggregates for near-infrared light-driven hydrogen evolution**

Huimin Bai,<sup>a,c</sup> Jie Wang,<sup>a,c</sup> Jianghong Zhao,<sup>\*a</sup> Hongxia Zhang,<sup>a</sup> Hu Shi,<sup>\*a, b</sup> and Pengju Yang<sup>\*a</sup>

---

a School of Chemistry and Chemical Engineering, Shanxi University, 030006, Taiyuan, China

b Institute of Molecular Science, Shanxi University, Taiyuan 030006, China

c These authors contributed equally to this work

## **Content:**

### **MD simulation and DFT calculation**

**Fig. S1.** (a) MD simulation of AT monomer, (b) AT monomer contact map based on MD simulations.

**Fig. S2.** (a) MD simulation of low aggregated AT, (b) Low aggregated AT contact map based on MD simulations.

**Fig. S3.** (a) MD simulation of high aggregated AT, (b) High aggregated AT contact map based on MD simulations.

**Fig. S4.** Normalized PL spectra of AT with different concentrations.

**Fig. S5.** PL spectra of AT aggregates under long-wavelength excitation.

**Fig. S6.** Calculated HOMO-LUMO gaps of AT dimers.

**Fig. S7.** Calculated HOMO-LUMO gaps of AT trimers.

**Fig. S8.** Calculated HOMO-LUMO gaps of AT tetramers.

**Fig. S9.** The function of reduced density gradient and  $\text{sign}(\lambda_2)\rho$  scatter spectrum for AT aggregates based on a MD simulation.

**Fig. S10.** NTO orbital analysis of AT monomer and aggregates.

**Fig. S11.** Schematic diagram of  $n \rightarrow \pi^*$  electronic transition of a AT dimer aggregate.

**Fig. S12.** Oscillator strengths of AT monomer and aggregates.

**Fig. S13.** Orbital interaction diagram of a AT dimer aggregate.

**Fig. S14.** Orbital interaction diagram of a AT trimer aggregate.

**Fig. S15.** Distance between adjacent AT molecules (b, c) based on MD simulation (a).

**Fig. S16.** Distance distributions between adjacent AT molecules based on S15.

**Fig. S17.** RGB integer of AT aggregates and reconstructed AT aggregates.

**Fig. S18.** Calculated HOMO-LUMO gaps of AT aggregates and reconstructed AT aggregates.

**Fig. S19.**  $^1\text{H-NMR}$  spectra (in  $\text{DMSO-d}_6$ ) of AT aggregates.

**Fig. S20.**  $^1\text{H-NMR}$  spectra (in  $\text{DMSO-d}_6$ ) of reconstructed AT aggregates.

**Fig. S21.** IR spectra of AT aggregates and reconstructed AT aggregates.

**Fig. S22.** Electrostatic potential distribution for reconstructed AT aggregates.

**Fig. S23.** Exciton binding energies of AT aggregates and reconstructed AT aggregates.

**Fig. S24.** Distribution of electrostatic potential and calculated dipole moments for AT aggregates and reconstructed AT aggregates.

**Fig. S25.** Hole-electron analysis of AT aggregates and reconstructed AT aggregates.

**Fig. S26.** Mott-Schottky plot of reconstructed AT aggregates.

**Fig. S27.** The color change of the reconstructed AT aggregates after 48 hours test.

**Fig. S28.** UV-vis absorption spectra of the reconstructed AT aggregates after 48 hours test.

**Fig. S29.** Hydrogen-bonded interactions between the reconstructed AT aggregates and L-A.

**Fig. S30.** UV-vis absorption spectra of reconstructed AT aggregates and reconstructed AT aggregates with L-A.

**Fig. S31.** Calculated HOMO-LUMO gaps of reconstructed AT aggregates and reconstructed AT aggregates with L-A.

**Fig. S32.** Orbital interaction diagram of reconstructed AT aggregates (dimer) and L-A.

**Fig. S33.** Hydrogen production performance of reconstructed AT aggregates with L-A under visible and red-light irradiation (500, 530, 590, and 610 nm).

**Fig. S34.** Hydrogen production performance of reconstructed AT aggregates with L-A under 500 nm irradiation.

**Fig. S35.** PL spectra of reconstructed AT aggregates with different aggregation degrees.

**Fig. S36.** Photocatalytic performances of reconstructed AT aggregates with different concentrations.

**Table S1.** Fitting parameters of time-resolved PL lifetime of AT aggregates and reconstructed AT aggregates.

**Table S2.** Fitting parameters of time-resolved PL lifetime of reconstructed AT aggregates, reconstructed AT aggregates 2 and 3.

**Table S3.** Comparison of hydrogen production activities with state-of-the-art photocatalysts under NIR light.

**Supplementary references**

**MD simulation:** MD simulations were performed using the Amber 18 and GROMACS 4.6.7 packages<sup>1</sup> with amber gaff force field for AT molecules<sup>2</sup> and amber14SB force field for the explicit TIP3P.<sup>3</sup> The simulation parameters of AT molecule were derived from Gaussian 09 with B3LYP/6-31G\* level. During the MD simulations, we used the SHAKE<sup>4</sup> method to restrict bonds, including H-bonding. During system modeling, the solute molecules were added into a cubic box of  $5 \times 5 \times 5 \text{ nm}^3$ , and then the solvent molecules were used to fill the box.<sup>5</sup> The particle mesh Ewald summation method was used to describe long-range electrostatics.<sup>6</sup> The cutoff distance is 1.0 nm for nonbonded interactions. The Langevin thermostat and Berendsen barostat were used for temperature and pressure control. In the current study, a 200 ns MD trajectory was collected in each system. After the equilibration checking, only the final equilibrated 50 ns trajectory was used for further analysis.

**DFT calculation:** All calculations were completed by Gaussian 09 software. Density functional theory (DFT) was used to optimize the geometric structures on ground-state properties of AT and reconstructed AT with the B3LYP functional method in combination with the 6-31G\* basis set,<sup>7</sup> while time-dependent DFT (TD-DFT, the same calculation method and basis set) was used to calculate the excited-state properties of AT and reconstructed AT aggregates. The convergence accuracy of SCF reached the default convergence standard. At the same time, the geometric configuration, HOMO-LUMO energy gap and excited-state orbital distribution of AT and reconstructed AT aggregates were analyzed and studied. The electrostatic potential and isosurface maps of various orbitals were exported and visualized with Multiwfn 3.8<sup>8</sup> and VMD

### 1.9.3 software.<sup>9</sup>

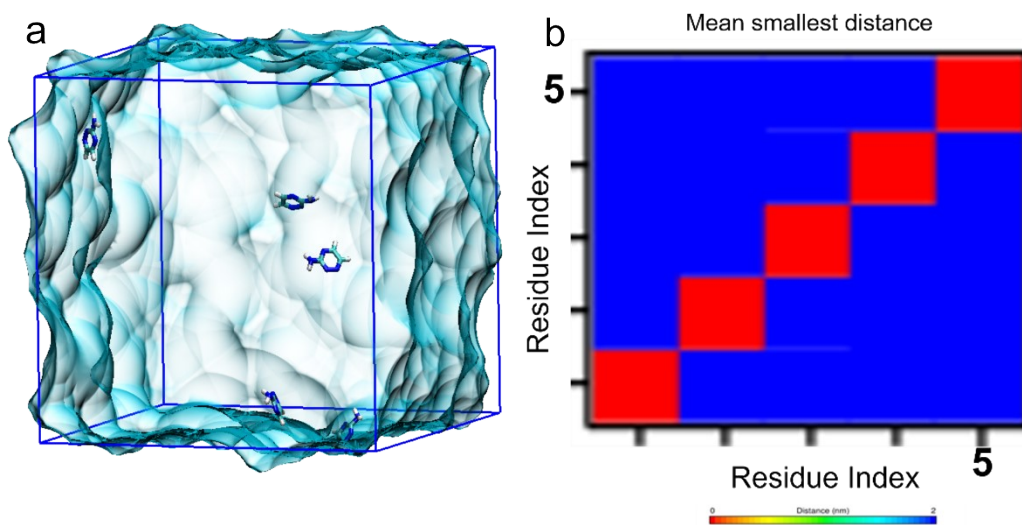

**Fig. S1.** (a) MD simulation of AT monomer, (b) AT monomer contact map based on MD simulations.

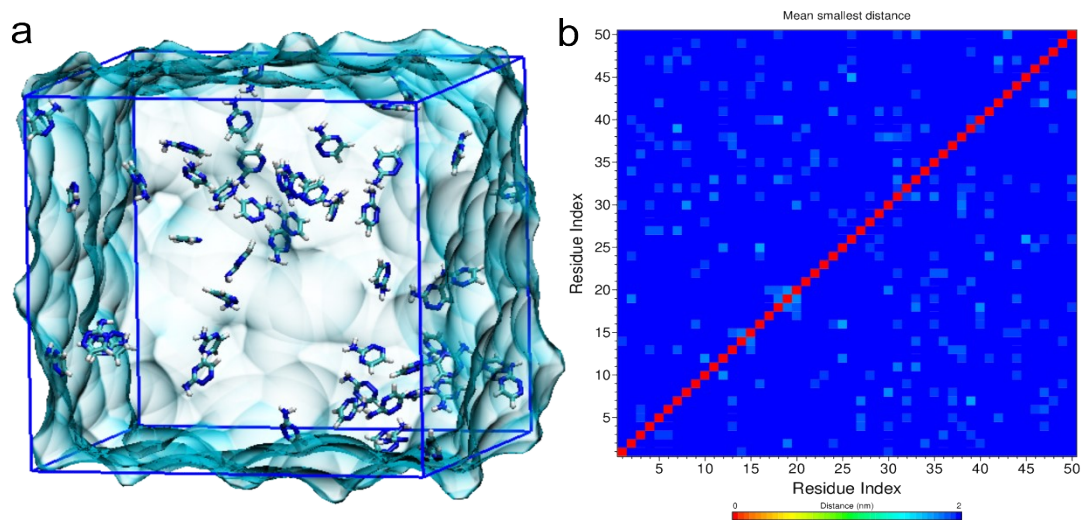

**Fig. S2.** (a) MD simulation of low aggregated AT, (b) Low aggregated AT contact map based on MD simulations.

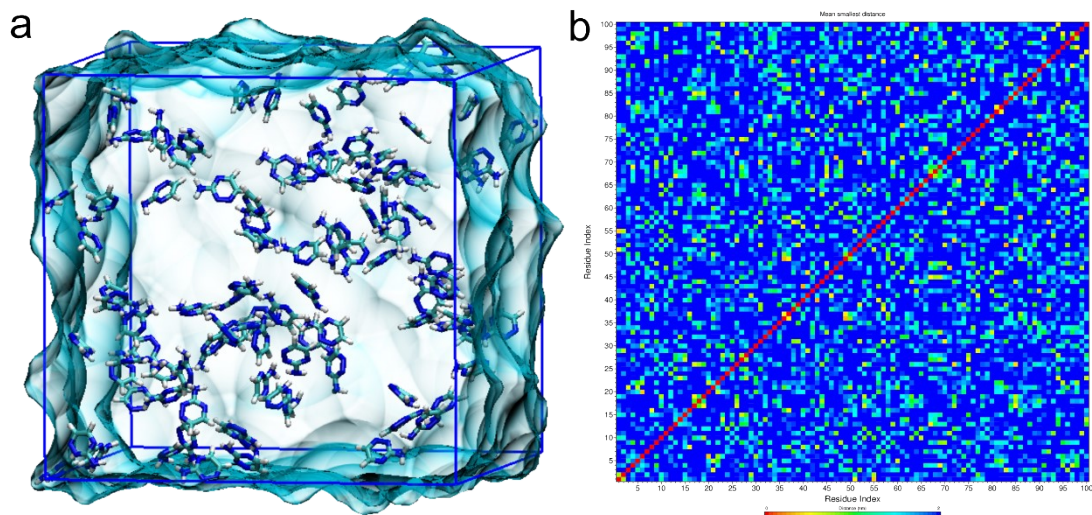

**Fig. S3.** (a) MD simulation of high aggregated AT, (b) High aggregated AT contact map based on MD simulations.



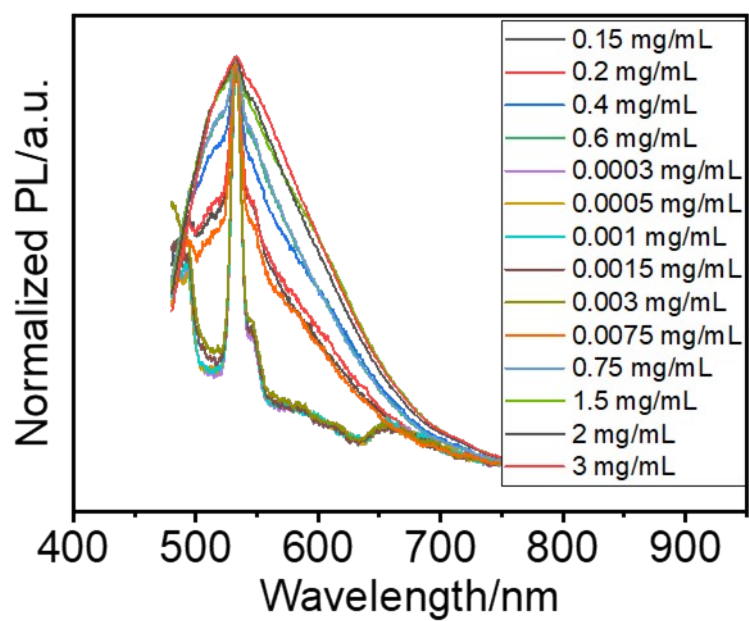

**Fig. S4.** Normalized PL spectra of AT with different concentrations.

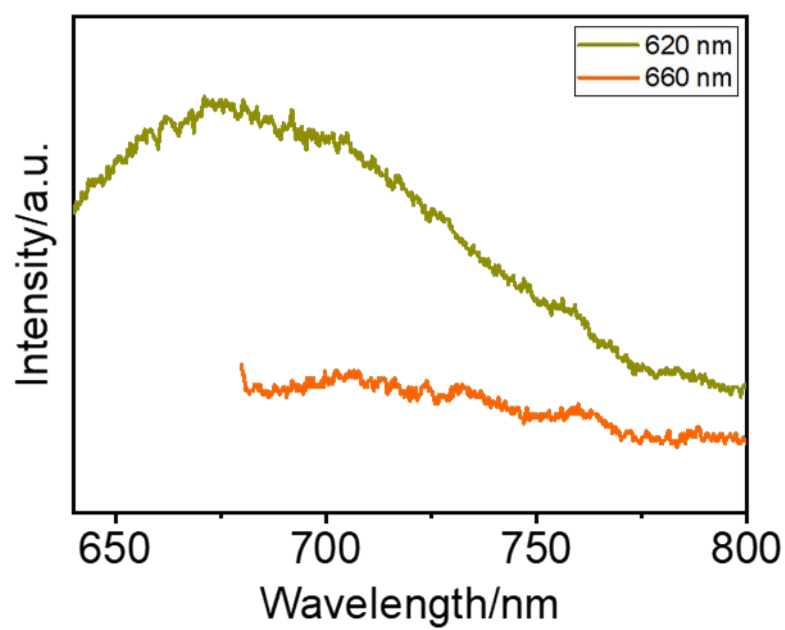

**Fig. S5.** PL spectra of AT aggregates under long-wavelength excitation.

| 2     | HOMO                                                                              | LUMO                                                                               | E <sub>g</sub> |
|-------|-----------------------------------------------------------------------------------|------------------------------------------------------------------------------------|----------------|
| Dimer | 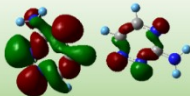 |  | 4.29 eV        |
| Dimer |  |  | 4.22 eV        |
| Dimer |  |  | 4.12 eV        |
| Dimer |  |  | 3.95 eV        |

Fig. S6. Calculated HOMO-LUMO gaps of AT dimers.

| 2      | HOMO                                                                              | LUMO                                                                               | E <sub>g</sub> |
|--------|-----------------------------------------------------------------------------------|------------------------------------------------------------------------------------|----------------|
| Trimer | 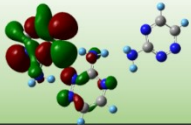 |  | 4.24 eV        |
| Trimer |  |  | 4.13 eV        |
| Trimer |  |  | 4.09 eV        |
| Trimer |  |  | 3.96 eV        |

**Fig. S7.** Calculated HOMO-LUMO gaps of AT trimers.

| 2        | HOMO | LUMO | E <sub>g</sub> |
|----------|------|------|----------------|
| Tetramer |      |      | 3.92 eV        |
| Tetramer |      |      | 3.53 eV        |
| Tetramer |      |      | 3.38 eV        |
| Tetramer |      |      | 3.05 eV        |

**Fig. S8.** Calculated HOMO-LUMO gaps of AT tetramers.

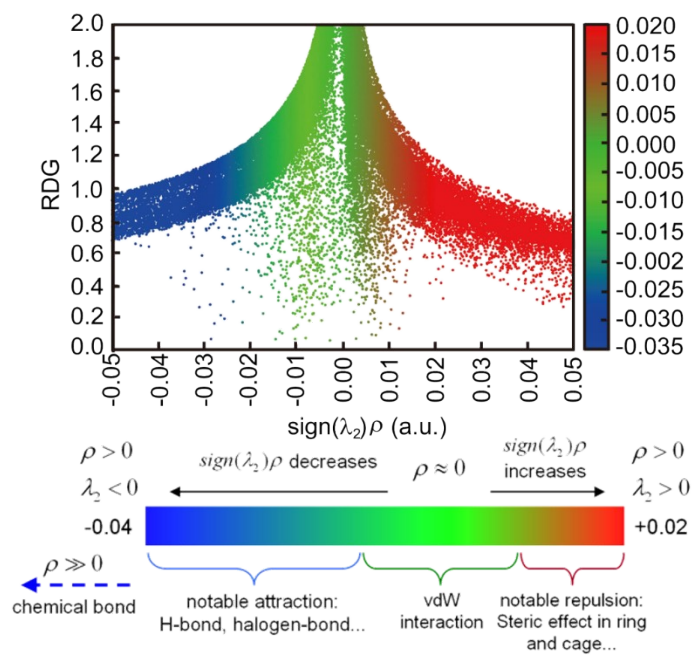

**Fig. S9.** The function of reduced density gradient and  $\text{sign}(\lambda_2)\rho$  scatter spectrum for AT aggregates based on a MD simulation.

|          | HOMO                                                                               | LUMO                                                                                | Transition type       |
|----------|------------------------------------------------------------------------------------|-------------------------------------------------------------------------------------|-----------------------|
| Monomer  | 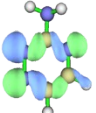  |    | $n \rightarrow \pi^*$ |
| Dimer    |   |   | $n \rightarrow \pi^*$ |
| Trimer   |   |   | $n \rightarrow \pi^*$ |
| Tetramer |  |  | $n \rightarrow \pi^*$ |

Fig. S10. NTO orbital analysis of AT monomer and aggregates.

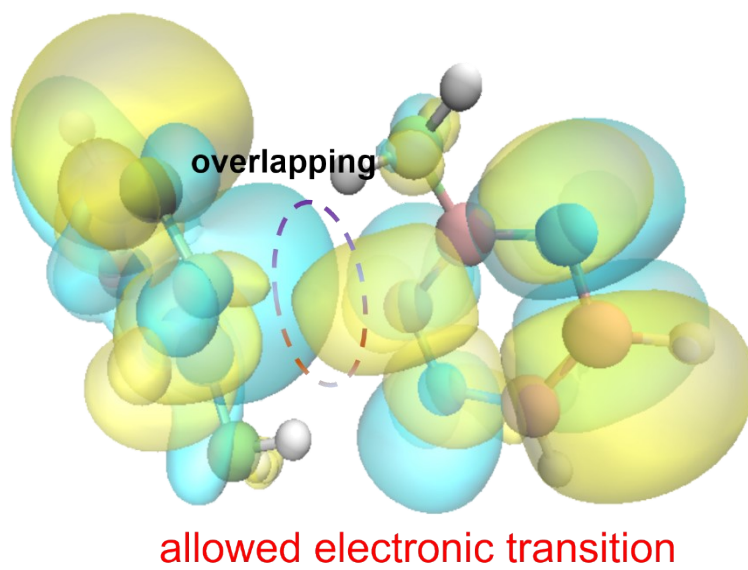

**Fig. S11.** Schematic diagram of  $n \rightarrow \pi^*$  electronic transition of a AT dimer aggregate.



| Asymmetric structure                                                                  | $f$ (oscillator) |
|---------------------------------------------------------------------------------------|------------------|
| n=1 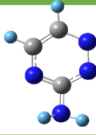 | 0.0054           |
| n=2  | 0.0099           |
| n=3  | 0.0103           |
| n=4  | 0.0206           |

**Fig. S12.** Oscillator strengths of AT monomer and aggregates.

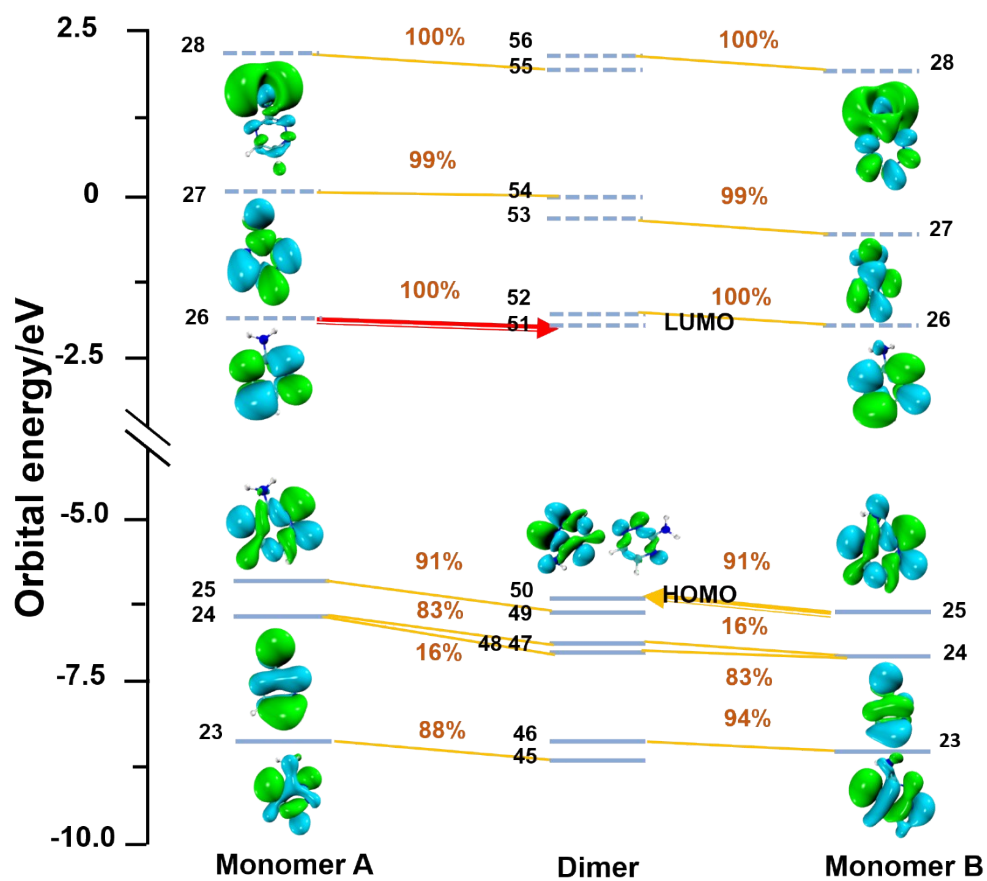

Fig. S13. Orbital interaction diagram of a AT dimer aggregate.

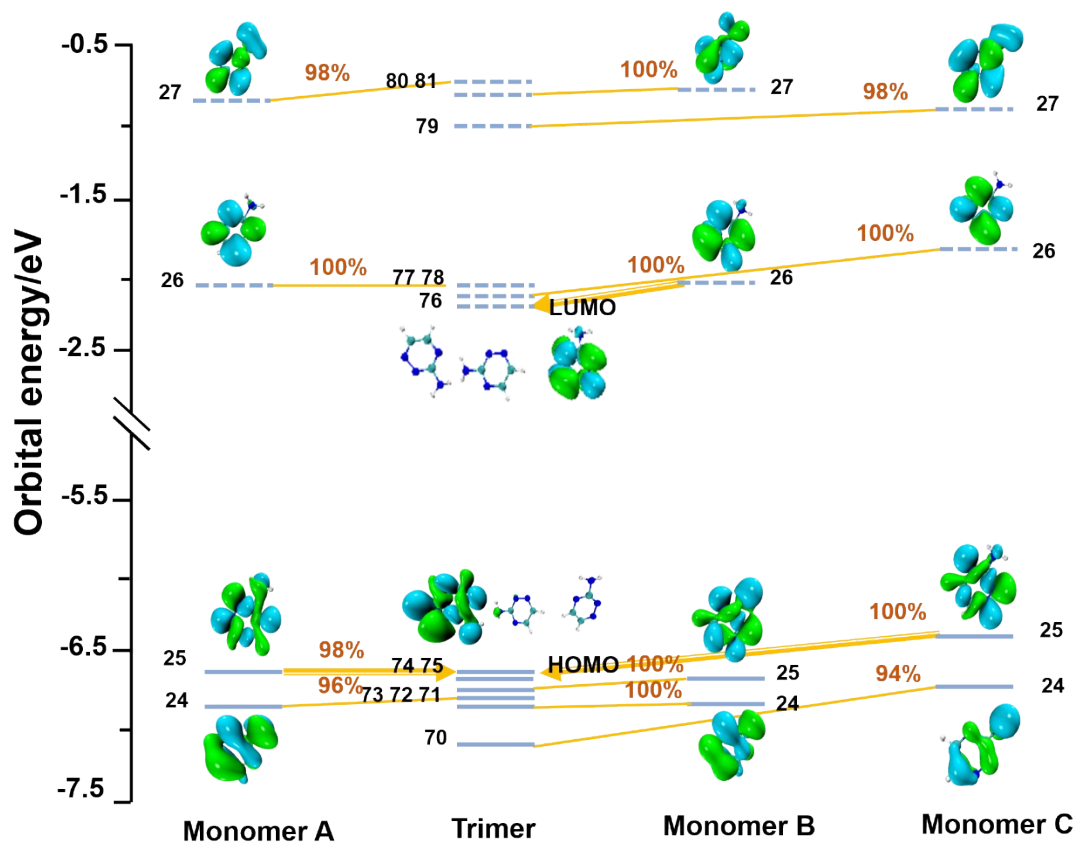

Fig. S14. Orbital interaction diagram of a AT trimer aggregate.

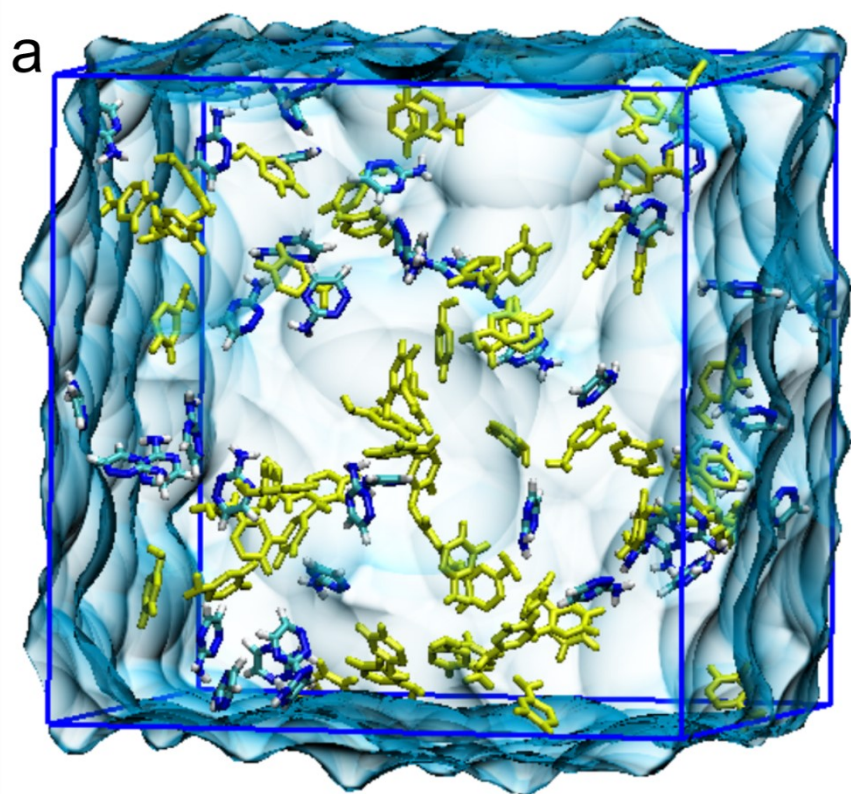

**b**

| Atomic number | Distance (Å)                                                                        | Atomic number | Distance (Å)                                                                          |
|---------------|-------------------------------------------------------------------------------------|---------------|---------------------------------------------------------------------------------------|
| 3-25          | 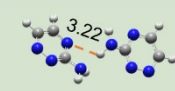   | 8-97          |    |
| 7-31          |    | 3-98          |    |
| 12-68         |    | 23-100        |    |
| 9-72          |    | 9-88          |    |
| 33-93         |    | 46-77         |    |
| 48-100        |    | 77-99         |    |
| 52-53         |   | 84-15         |   |
| 59-100        |  | 86-85         |  |
| 61-58         |  | 90-97         |  |
| 73-8          |  | 99-46         |  |
| 58-86         |  | 49-37         |  |
| 2-29          |  | 26-72         |  |
| 73-66         |  | 33-80         |  |
| 69-4          |  | 7-69          |  |
| 44-18         |  | 47-25         |  |

**C**

| Atomic number | Distance (Å)                                                                        | Atomic number | Distance (Å)                                                                          |
|---------------|-------------------------------------------------------------------------------------|---------------|---------------------------------------------------------------------------------------|
| 14-50         | 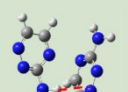   | 47-81         |    |
| 33-93         |    | 48-100        |    |
| 34-9          |    | 53-2          |    |
| 34-38         |    | 62-81         |    |
| 37-50         |    | 66-68         |    |
| 66-86         |    | 91-15         |    |
| 72-9          |    | 97-19         |    |
| 69-68         |   | 93-18         |   |
| 77-99         |  | 97-39         |  |
| 84-57         |  | 99-11         |  |
| 61-78         |  | 41-77         |  |
| 85-53         |  | 100-94        |  |
| 47-71         |  | 84-87         |  |
| 60-5          |  | 31-57         |  |
| 64-93         |  | 40-43         |  |

**Fig. S15.** Distance between adjacent AT molecules (b, c) based on MD simulation (a).

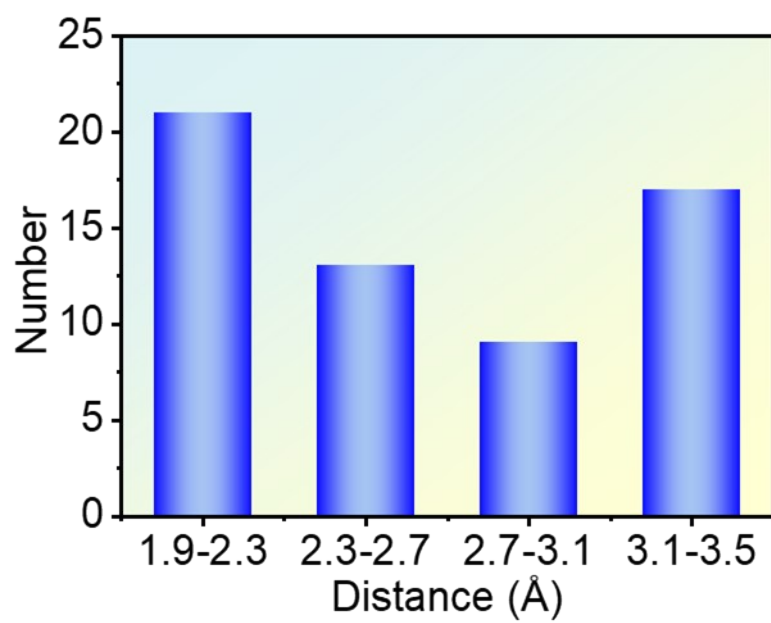

**Fig. S16.** Distance distributions between adjacent AT molecules based on S15.

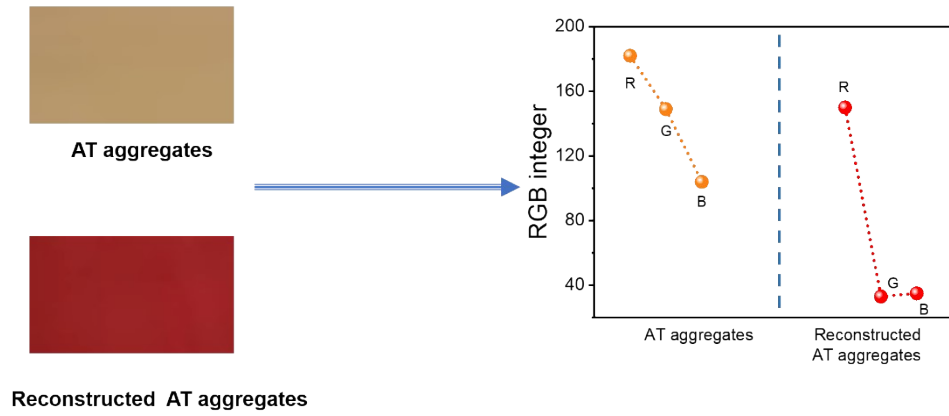

**Fig. S17.** RGB integer of AT aggregates and reconstructed AT aggregates (RGB represents the color of the red, green, and blue channels).



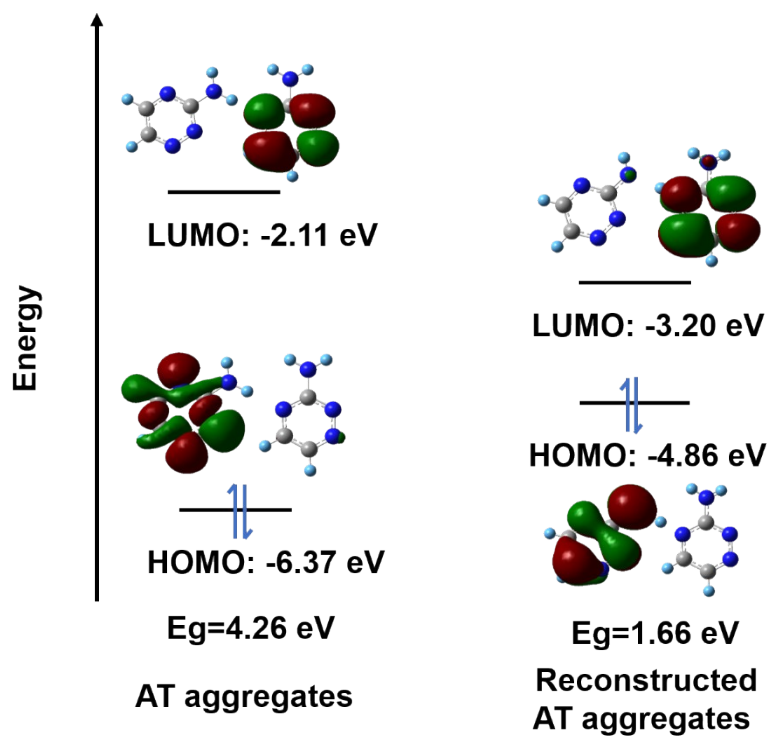

**Fig. S18.** Calculated HOMO-LUMO gaps of AT aggregates and reconstructed AT aggregates.

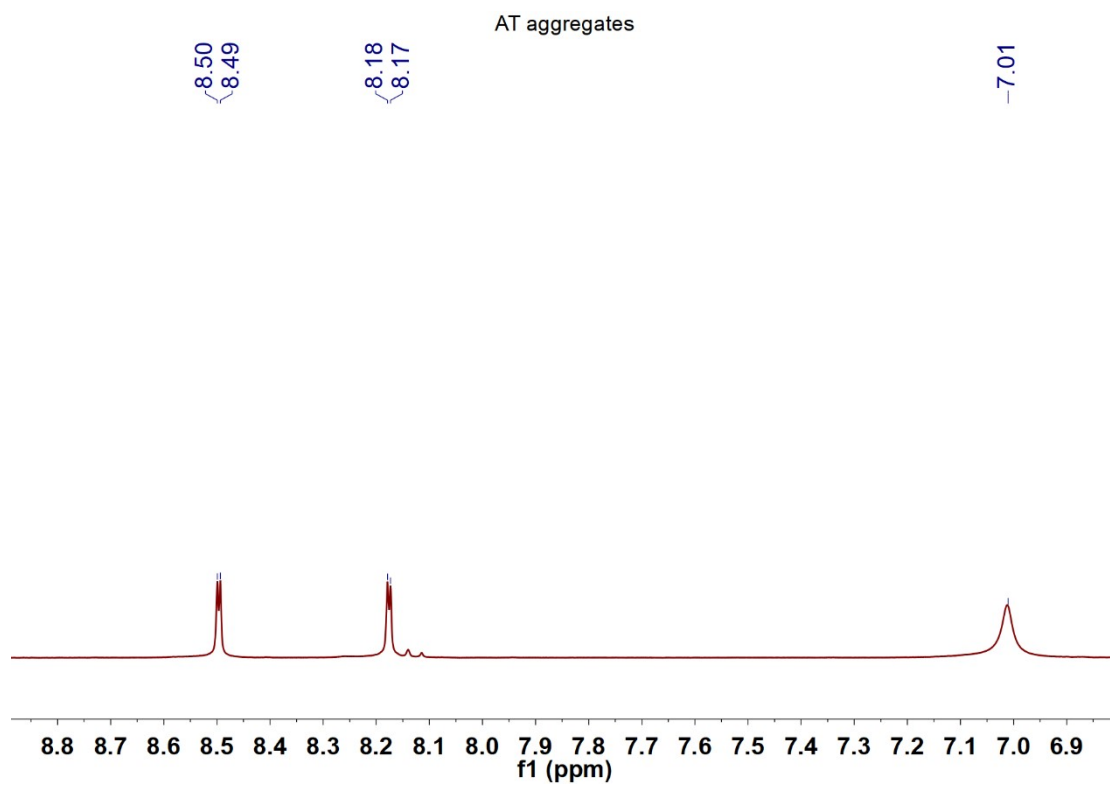

**Fig. S19.**  $^1\text{H-NMR}$  spectra (in  $\text{DMSO-d}_6$ ) of AT aggregates.

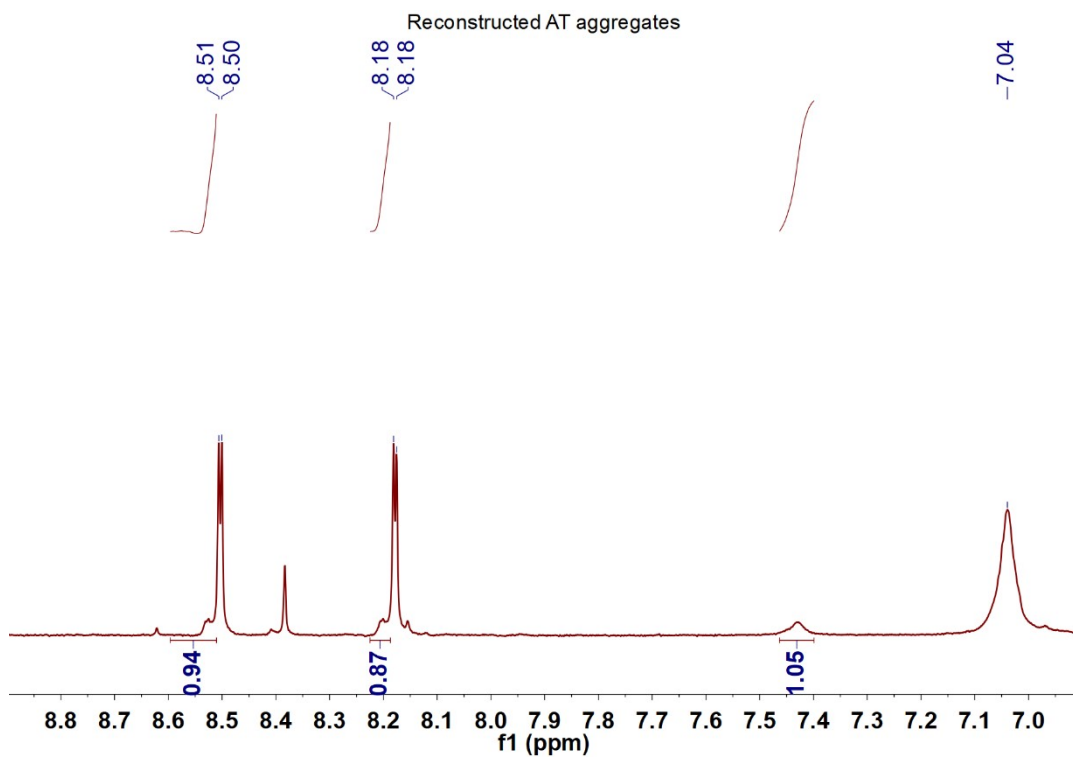

**Fig. S20.**  $^1\text{H}$ -NMR spectra (in  $\text{DMSO-d}_6$ ) of reconstructed AT aggregates.

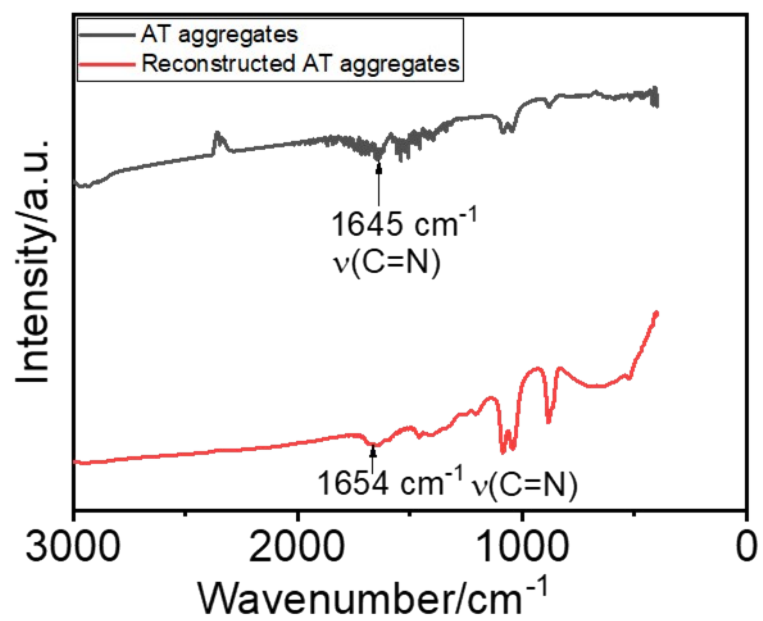

**Fig. S21.** FTIR spectra of AT aggregates and reconstructed AT aggregates.

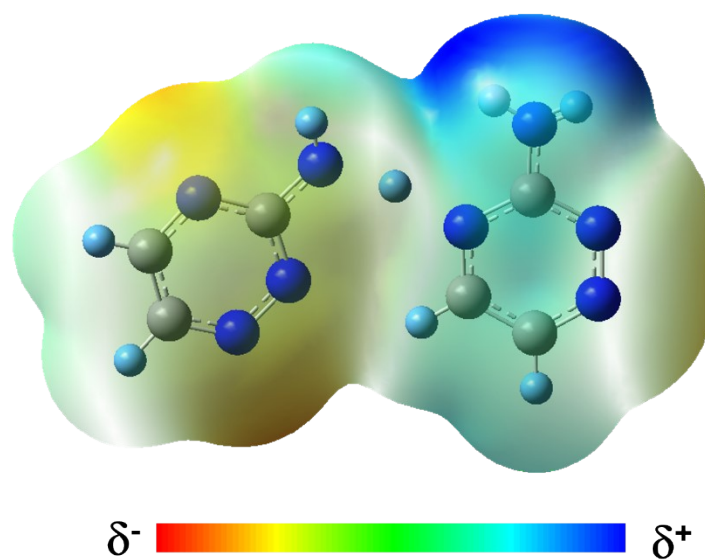

**Fig. S22.** Electrostatic potential distribution for reconstructed AT aggregates.

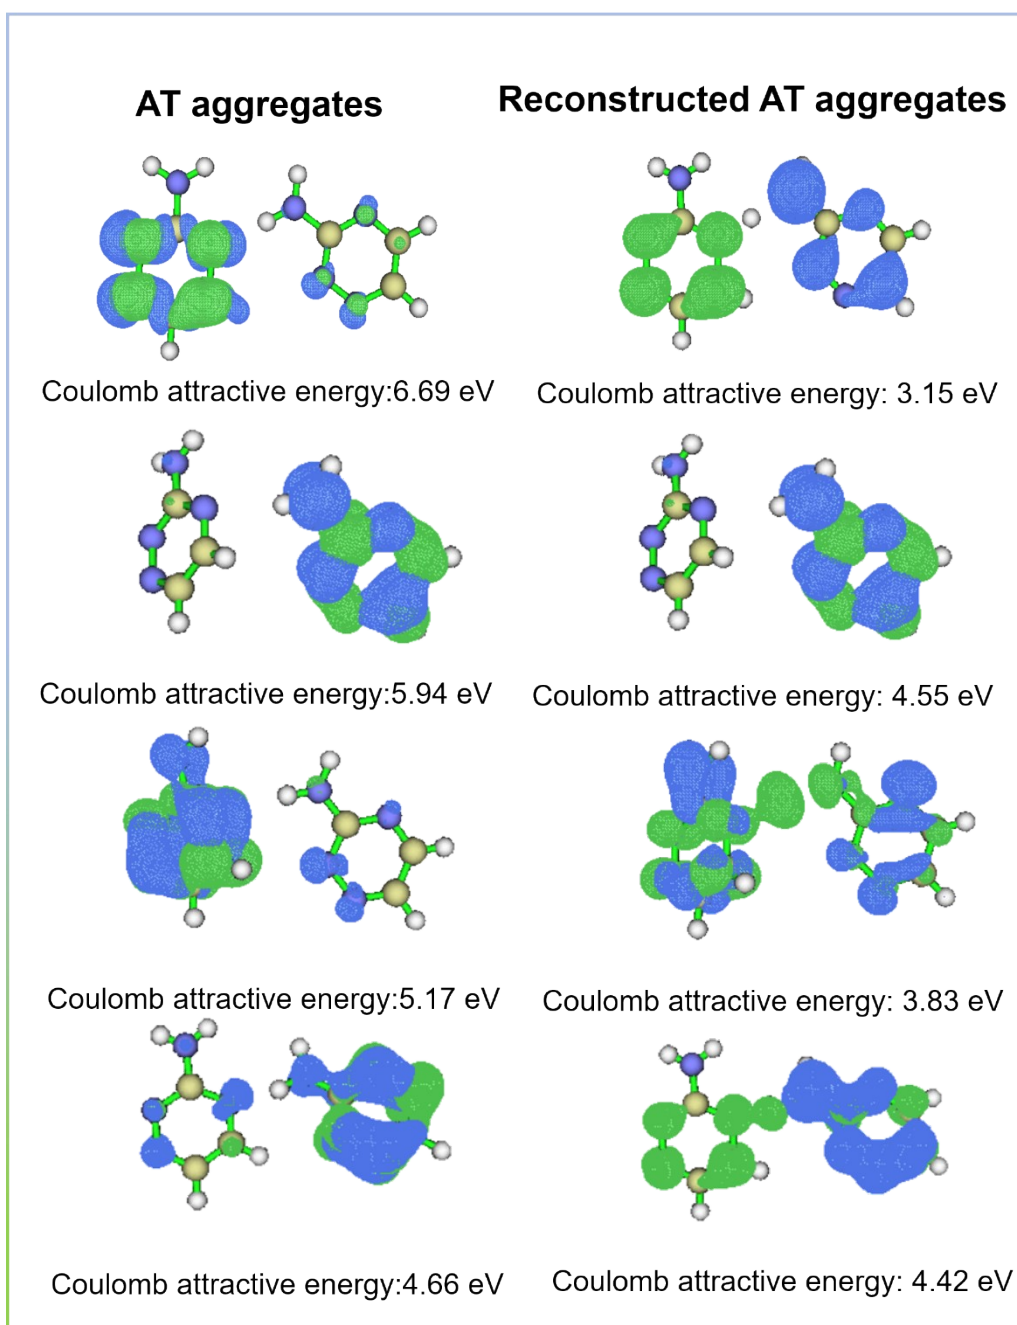

**Fig. S23.** Exciton binding energies of AT aggregates and reconstructed AT aggregates.

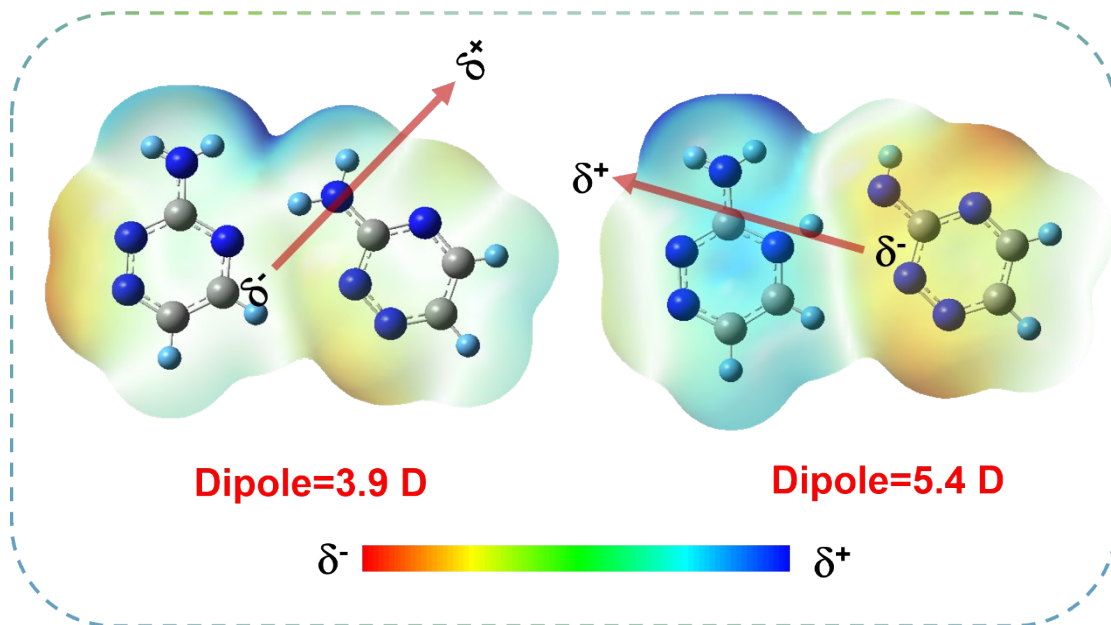

**Fig. S24.** Distribution of electrostatic potential and calculated dipole moments for AT aggregates and reconstructed AT aggregates.

|                                        | <b>D</b><br>(Å) | <b>S<sub>r</sub></b><br>(a.u.) | <b>S<sub>m</sub></b><br>(a.u.) | <b>H</b><br>(Å) | <b>HDI</b> | <b>EDI</b> |
|----------------------------------------|-----------------|--------------------------------|--------------------------------|-----------------|------------|------------|
| <b>AT aggregates</b>                   | 0.506           | 0.745                          | 0.526                          | 2.192           | 9.30       | 9.41       |
| <b>Reconstructed<br/>AT aggregates</b> | 0.591           | 0.686                          | 0.470                          | 3.334           | 7.06       | 6.75       |

**Fig. S25.** Hole-electron analysis of AT aggregates and reconstructed AT aggregates.



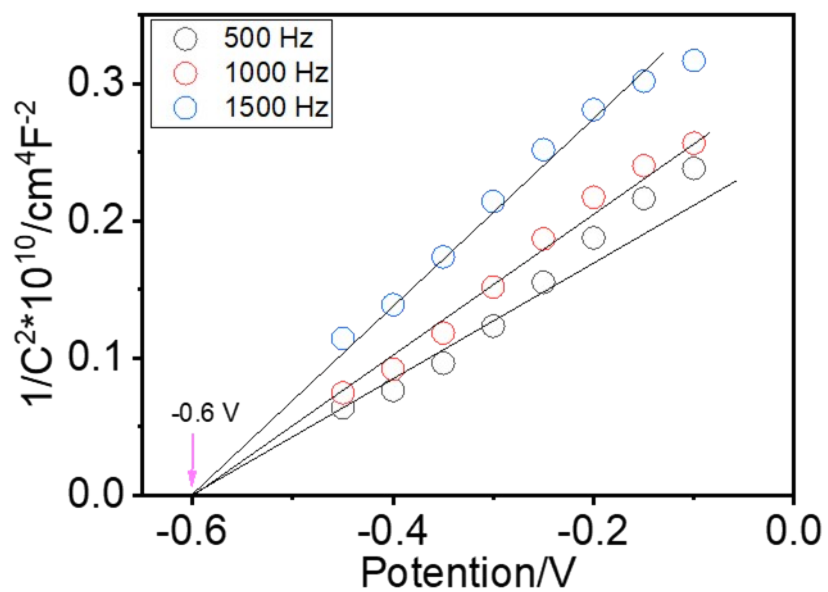

**Fig. S26.** Mott-Schottky plot of reconstructed AT aggregates. (As a rule of thumb, the difference between the CB and the FB is  $\sim 0.2 \text{ V}^{[10]}$ . The conduction band (CB) of reconstructed AT aggregates are estimated to be  $-0.56 \text{ V}$  (vs NHE pH = 7)).

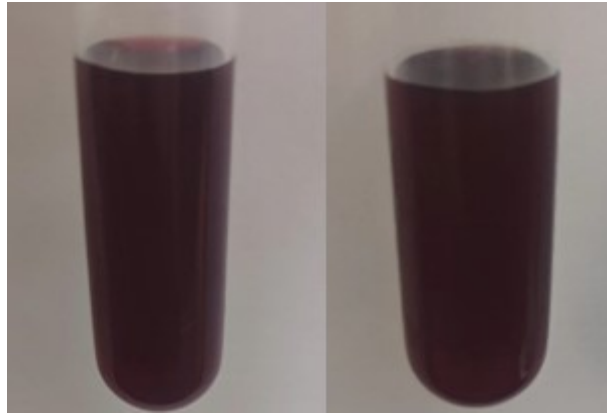

**Fig. S27.** The color change of the reconstructed AT aggregates after 48 hours test.

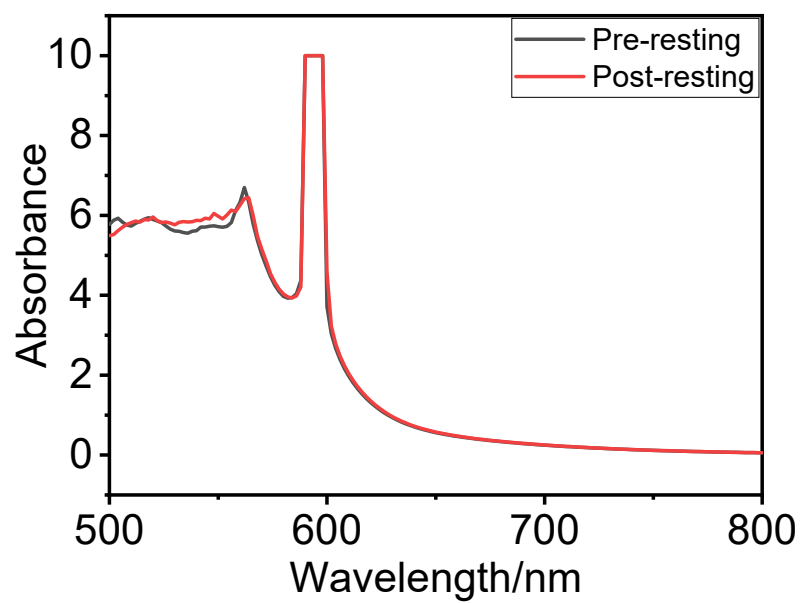

**Fig. S28.** UV-vis absorption spectra of the reconstructed AT aggregates after 48 hours test.

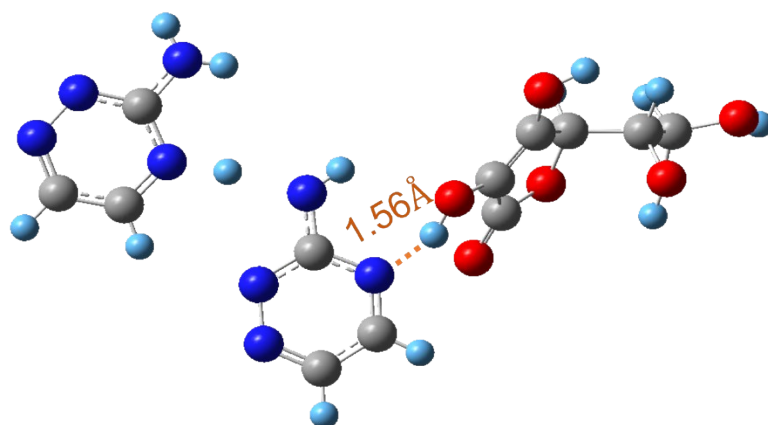

Interaction energy = -8.45 kJ/mol

**Fig. S29.** Hydrogen-bonded interactions between the reconstructed AT aggregates and L-A.

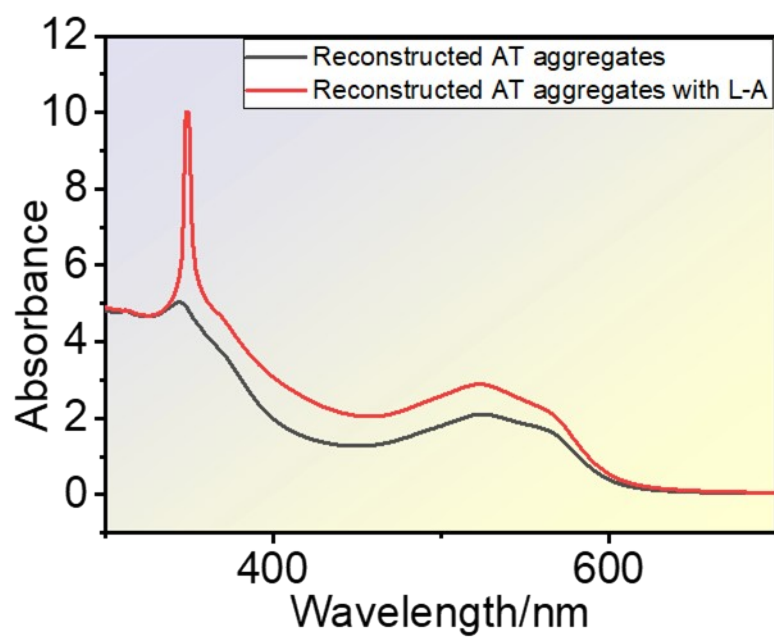

**Fig. S30.** UV-vis absorption spectra of reconstructed AT aggregates and reconstructed AT aggregates with L-A.

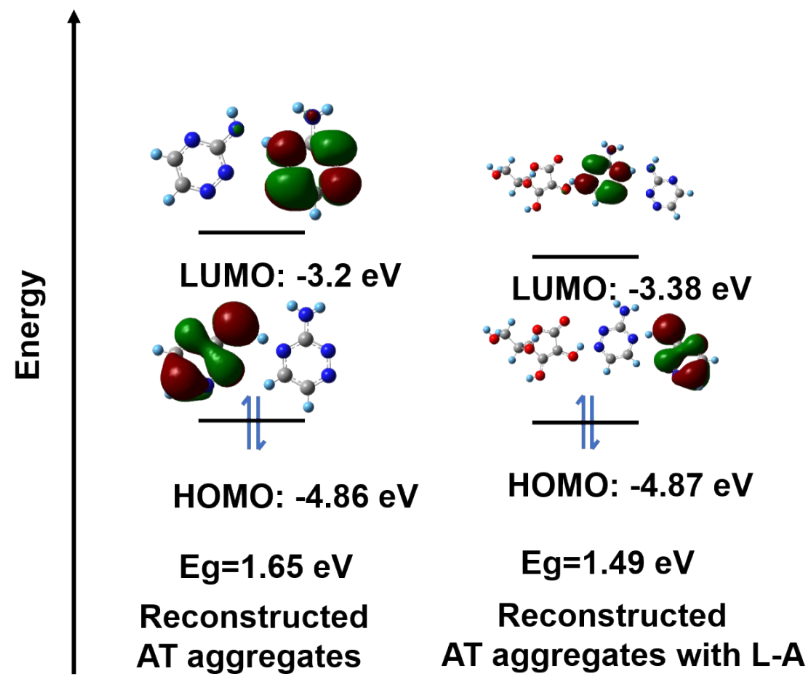

**Fig. S31.** Calculated HOMO-LUMO gaps of reconstructed AT aggregates and reconstructed AT aggregates with L-A.

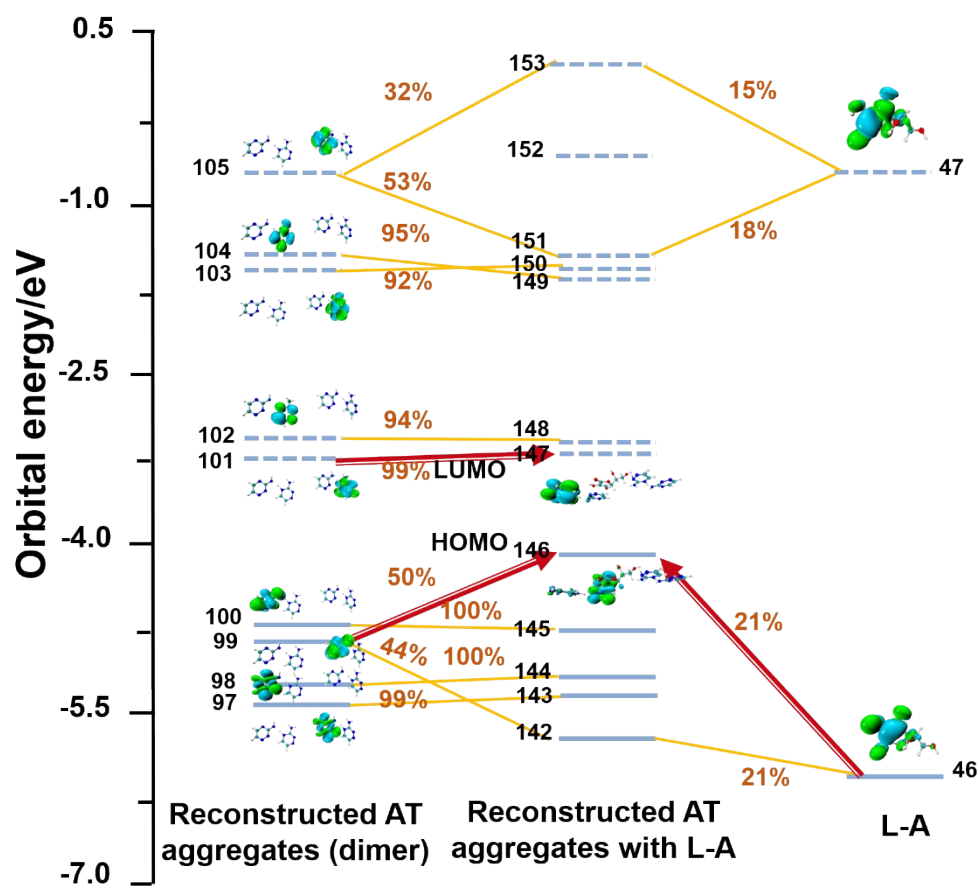

Fig. S32. Orbital interaction diagram of reconstructed AT aggregates (dimer) and L-A.

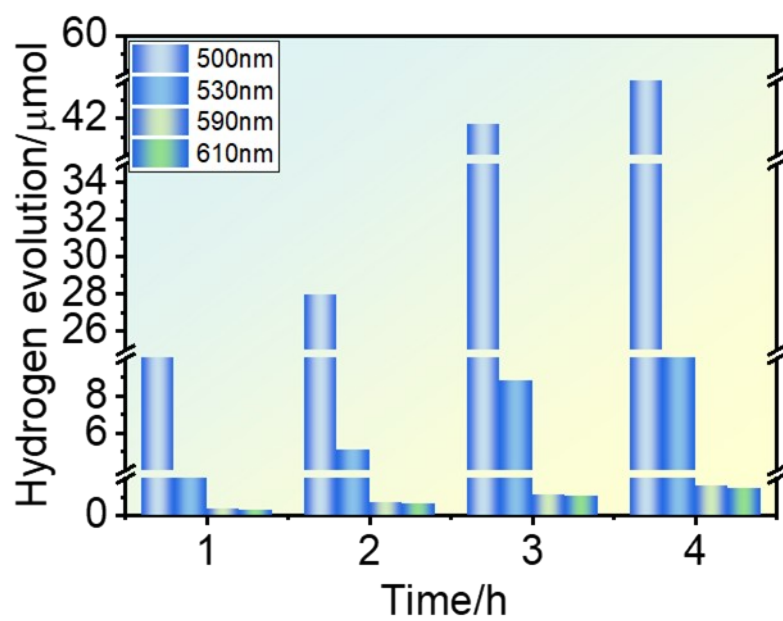

**Fig. S33.** Hydrogen production performance of reconstructed AT aggregates with L-A under visible and red-light irradiation (500, 530, 590, and 610 nm).



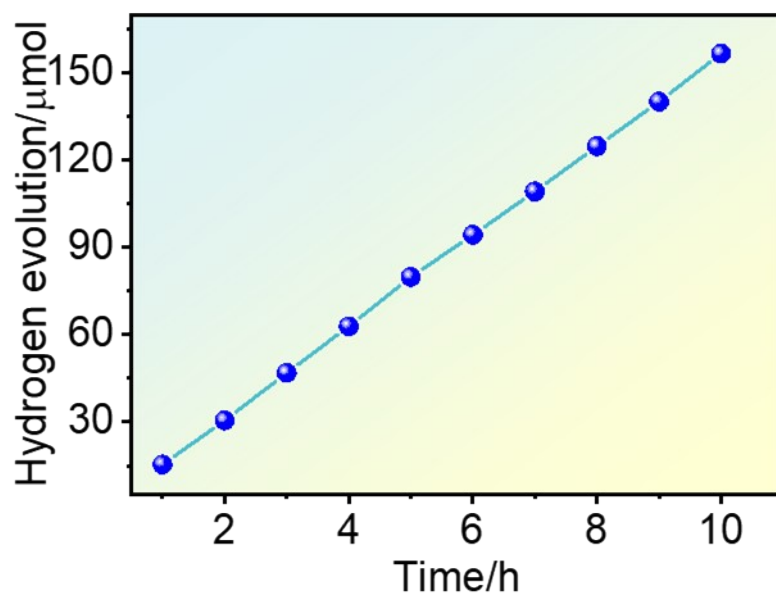

**Fig. S34.** Hydrogen production performance of reconstructed AT aggregates with L-A under 500 nm irradiation.

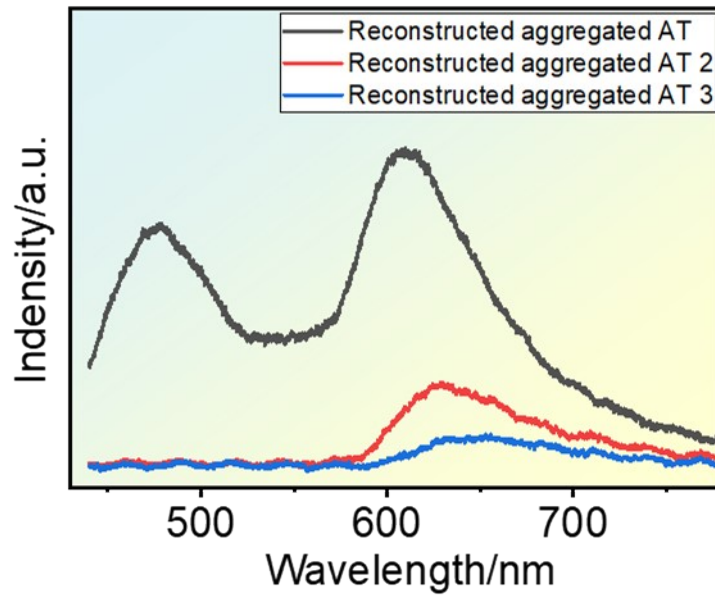

**Fig. S35.** PL spectra of reconstructed AT aggregates with different aggregation degrees.

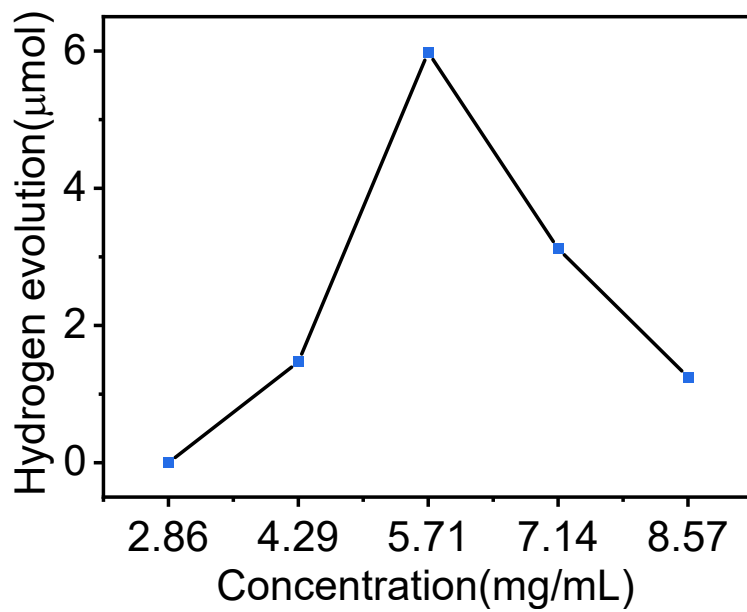

**Fig. S36.** Photocatalytic performances of reconstructed AT aggregates with different concentrations (reaction time: 4h; center wavelength: 850 nm; light intensity: 156 mW/cm<sup>2</sup>).

**Table S1.** Fitting parameters of time-resolved PL lifetime of AT aggregates and

reconstructed AT aggregates

| samples                     | $\tau_1/\text{ns}$ | $\tau_2/\text{ns}$ | $\tau_3/\text{ns}$ | $\tau_{\text{ave}}/\text{ns}$ |
|-----------------------------|--------------------|--------------------|--------------------|-------------------------------|
| AT aggregates               | 0.50(28.8%)        | 3.12(45.8%)        | 8.27(25.4%)        | 3.67 ns                       |
| Reconstructed AT aggregates | 0.52(12.8%)        | 2.17(28.7%)        | 6.50(58.5%)        | 4.50 ns                       |

Note:  $\tau_{\text{ave}} = \frac{A_1 \tau_1^2 + A_2 \tau_2^2 + A_3 \tau_3^2}{A_1 \tau_1 + A_2 \tau_2 + A_3 \tau_3}$

**Table S2.** Fitting parameters of time-resolved PL lifetime of reconstructed AT aggregates, reconstructed AT aggregates 2 and 3

| samples                       | $\tau_1/\text{ns}$ | $\tau_2/\text{ns}$ | $\tau_3/\text{ns}$ | $\tau_{\text{ave}}/\text{ns}$ |
|-------------------------------|--------------------|--------------------|--------------------|-------------------------------|
| Reconstructed AT aggregates   | 0.56(14.9%)        | 2.48(31.8%)        | 6.87(53.3%)        | 4.53 ns                       |
| Reconstructed AT aggregates 2 | 0.57(5.2%)         | 3.20(56.9%)        | 9.54(37.9%)        | 5.46 ns                       |
| Reconstructed AT aggregates 3 | 0.84(18.3%)        | 4.44(62.2%)        | 17.01(19.6%)       | 6.26 ns                       |

Note:  $\tau_{\text{ave}} = \frac{A_1 \tau_1^2 + A_2 \tau_2^2 + A_3 \tau_3^2}{A_1 \tau_1 + A_2 \tau_2 + A_3 \tau_3}$

**Table S3.** Comparison of hydrogen production activities with state-of-the-art photocatalysts under NIR light.

| Photocatalysts                                                   | Electron donors                                   | QYs/%                                        | Refs.     |
|------------------------------------------------------------------|---------------------------------------------------|----------------------------------------------|-----------|
| PM6:2FBP-4F                                                      | Ascorbic acid                                     | 13.9(808 nm)                                 | 11        |
| W <sub>18</sub> O <sub>49</sub> /g-C <sub>3</sub> N <sub>4</sub> | Triethanolamine                                   | 0.016(800 nm)                                | 12        |
| Au nanorods/La <sub>2</sub> Ti <sub>2</sub> O <sub>7</sub>       | Methanol                                          | 0.85(800 nm)                                 | 13        |
| BP/TMC                                                           | Methanol                                          | 1.2(780 nm)                                  | 14        |
| BP/g-C <sub>3</sub> N <sub>4</sub>                               | Methanol                                          | 1.1(780 nm)                                  | 15        |
| BP/Pt/RGO                                                        | Ethylene Diamine<br>Tetraacetic Acid              | 1.5(780 nm)                                  | 16        |
| CdS/Cu <sub>7</sub> S <sub>4</sub>                               | Na <sub>2</sub> S-Na <sub>2</sub> SO <sub>3</sub> | 0.85(800 nm)                                 | 17        |
| Amorphous Co <sub>2</sub> B                                      | Triethanolamine                                   | 1.15(800 nm)<br>1.8(1000 nm)<br>3.8(1100 nm) | 18        |
| Pt/CdS/NYF                                                       | ----                                              | 0.008(800 nm)                                | 19        |
| TiO <sub>2</sub> /r-GQDs                                         | ----                                              | 0.26(850 nm)                                 | 20        |
| PA-Ni@PCN                                                        | Methanol                                          | 2.8(940 nm)                                  | 21        |
| Reconstructed AT aggregates                                      | Formic acid                                       | 1.23(850 nm)                                 | This work |

## Supplementary references

- 1 S. Chaudhury, S. Lyskov, J. J. Gray, *Bioinformatics* 2010, **26**, 689-691.
- 2 V. Hornak, R. Abel, A. Okur, B. Strockbine, A. Roitberg, C. Simmerling, *Proteins* 2006, **65**, 712-725.
- 3 W. Jorgensen, J. Chandrasekhar, J. Madura, R. Impey, M. Klein, *J. Chem. Phys.* 1983, **79**, 926-935.
- 4 S. Miyamoto, P. A. Kollman, *J. Comput. Chem.* 1992, **13**, 952-962.
- 5 P. Eastman, M. S. Friedrichs, J. D. Chodera, R. J. Radmer, C. M. Bruns, J. P. Ku, K. A. Beauchamp, T. J. Lane, L. P. Wang, D. Shukla, T. Tye, M. Houston, T. Stich, C. Klein, M. R. Shirts, V. S. Pande, *J. Chem. Theory Comput.* 2013, **9**, 461-469.
- 6 S. Piana, K. Lindorff-Larsen, David E. Shaw, *Biophysical Journal* 2011, **100**, L47-L49.
- 7 J. Tirado-Rives, W. L. Jorgensen, *J. Chem. Theory Comput.* 2008, **4**, 297-306.
- 8 T. Lu, F. Chen, *J. Comput. Chem.* 2012, **33**, 580-592.
- 9 W. Humphrey, A. Dalke, K. Schulten, *J. Mol. Graph.* 1996, **14**, 33-38.
- 10 N. Hirayama, H. Nakata, H. Wakayama, S. Nishioka, T. Kanazawa, R. Kamata, Y. Ebato, K. Kato, H. Kumagai, A. Yamakata, K. Oka, K. Maeda, *J. Am. Chem. Soc.* 2019, **141**, 17158-17165.
- 11 Z. Zhang, C. Xu, Q. Sun, Y. Zhu, W. Yan, G. Cai, Y. Li, W. Si, X. Lu, W. Xu, Y. Yang, Y. Lin, *Angew. Chem. Int. Ed.* 2024, **63**, e202402343.
- 12 Z. Zhang, J. Huang, Y. Fang, M. Zhang, K. Liu, B. Dong, *Adv. Mater.* 2017, **29**, 1606688.
- 13 X. Cai, M. Zhu, O. A. Elbanna, M. Fujitsuka, S. Kim, L. Mao, J. Zhang, T. Majima, *ACS Catal.* **2018**, **8**, 122-131.
- 14 O. Elbanna, M. Zhu, M. Fujitsuka, T. Majima, *ACS Catal.* 2019, **9**, 3618-3626.
- 15 M. Zhu, S. Kim, L. Mao, M. Fujitsuka, J. Zhang, X. Wang, T. Majima, *J. Am. Chem. Soc.* 2017, **139**, 13234-13242.
- 16 M. Zhu, Y. Osakada, S. Kim, M. Fujitsuka, T. J. A. C. B.-e. Majima, *Appl. Catal. B Environ.* 2017, **217**, 285-292.
- 17 Z. Lian, M. Sakamoto, J. J. M. Vequizo, C. S. K. Ranasinghe, A. Yamakata, T. Nagai, K. Kimoto, Y. Kobayashi, N. Tamai, T. Teranishi, *J. Am. Chem. Soc.* 2019, **141**, 2446-2450.
- 18 J. Tang, T. Zhao, Y. He, R. Guo, W. Pan, H. Zhang, B. Dou, *Renewable Energy* 2024, **222**, 119916.
- 19 W. Gao, B. Tian, W. Zhang, X. Zhang, Y. Wu, G. Lu, *Appl. Catal. B Environ.* 2019, **257**, 117908.
- 20 D. Jia, X. Li, Q. Chi, J. Low, P. Deng, W. Wu, Y. Wang, K. Zhu, W. Li, M. Xu, X. Xu, G. Jia, W. Ye, P. Gao, Y. Xiong, *Research* 2022, **2022**, 9781453.
- 21 Y. Huang, Y. Jian, L. Li, D. Li, Z. Fang, W. Dong, Y. Lu, B. Luo, R. Chen, Y. Yang, M. Chen, W. Shi, *Angew. Chem. Int. Ed.* 2021, **60**, 5245-5249.
